# Supplementary material for: Ln[DO3A-N-α-(pyrenebutanamido)propionate] complexes: optimized relaxivity and NIR optical properties
Source: Royal Society of Chemistry journal article supplement (doi:10.1039/c3dt52958d), 2013-12-17
Supplement: c3dt52958d.pdf [file c3dt52958d.pdf]

## Supplementary Information

Ln[DO3A-*N*- $\alpha$ -(pyrenebutanamido)propionate] complexes: optimized relaxivity and NIR optical properties

M.F. Ferreira<sup>a</sup>, G. Pereira<sup>a</sup>, A.F. Martins<sup>b,c</sup>, C. Martins<sup>b</sup>, M.I.M. Prata<sup>d</sup>, S. Petoud<sup>c</sup>, E. Toth<sup>c</sup>, P.M.T. Ferreira<sup>a</sup>, J.A. Martins<sup>a,e\*</sup> C.F.G.C. Geraldes<sup>b</sup>

<sup>a</sup>Centro de Química, Campus de Gualtar, Universidade do Minho, 4710-057 Braga, Portugal; <sup>e</sup> Currently in sabbatical leave at Dep. of Chemistry University of Bath, UK

<sup>b</sup>Department of Life Sciences, Faculty of Science and Technology, Centre of Neurosciences and Cell Biology, and Coimbra Chemistry Centre, University of Coimbra, 3001-401 Coimbra, Portugal

<sup>c</sup>Centre de Biophysique Moléculaire CNRS, Rue Charles Sadron, 45071 Orléans Cedex 2 France

<sup>d</sup>ICNAS and IBILI, Faculty of Medicine, University of Coimbra, 3000-548 Coimbra, Portugal

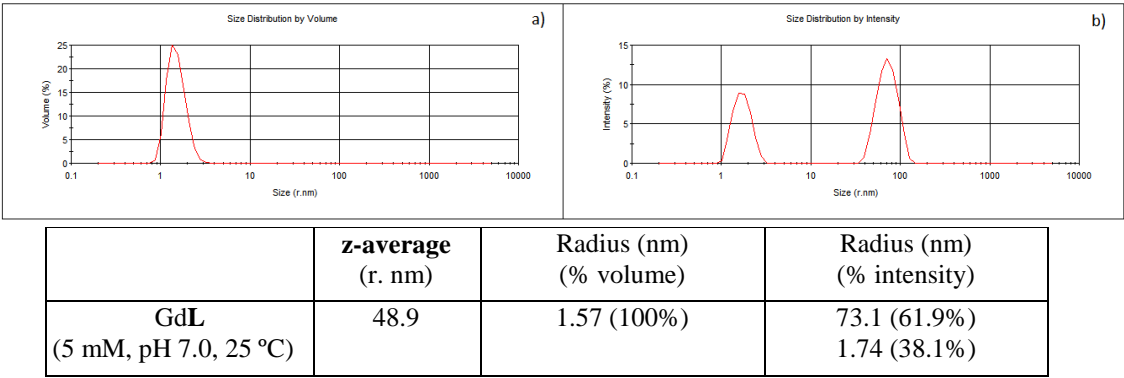

**Figure S1.** Size distribution in: a) volume (%); b) intensity (%) for a GdL solution (5.0 mM, pH 7.0, 25 °C) at a concentration well above the *cmc* (0.6 mM).

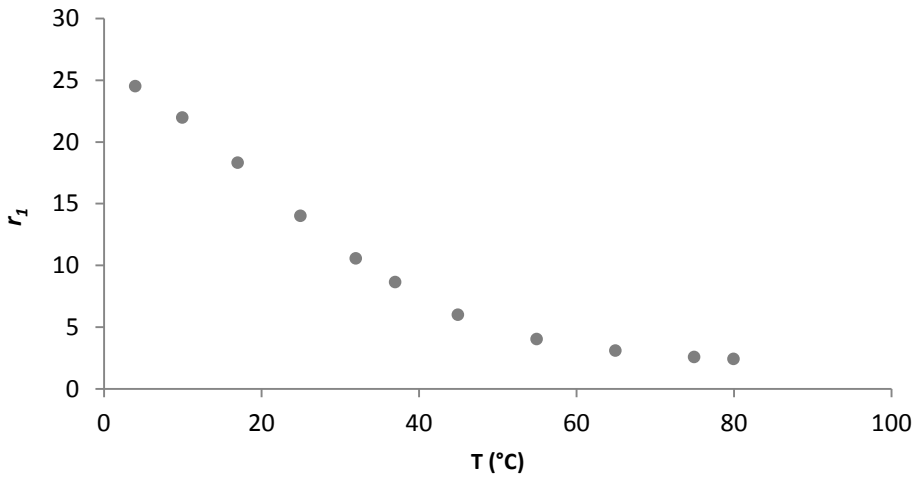

**Figure S2.** Temperature dependence of the water proton relaxivity for GdL (20MHz, 1mM, pH 6.0).

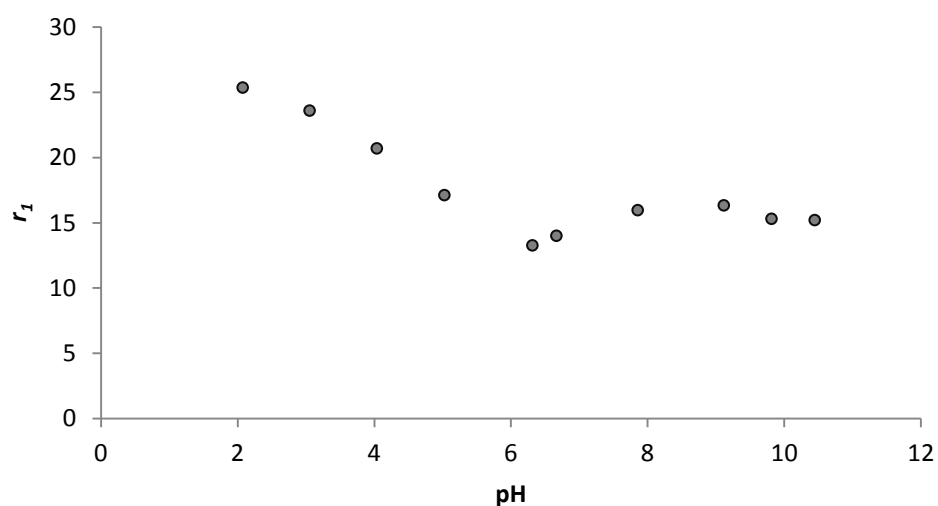

**Figure S3.** pH dependence of the water proton relaxivity for GdL (20 MHz, 1 mM, 25 °C).

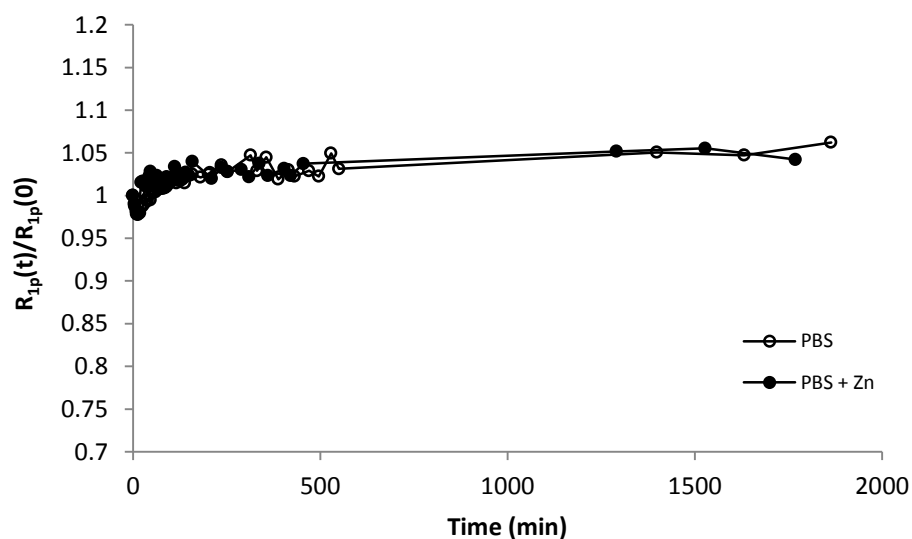

**Figure S4.** Evolution of the relative water proton paramagnetic longitudinal relaxation rate  $R_{1p}(t)/R_{1p}(0)$  (20 MHz, pH 7.1, 25 °C) for a 1.5 mM solution of GdL in 10 mM phosphate buffer(○) and in phosphate buffer containing an equimolar amount of  $Zn^{2+}$  (●).

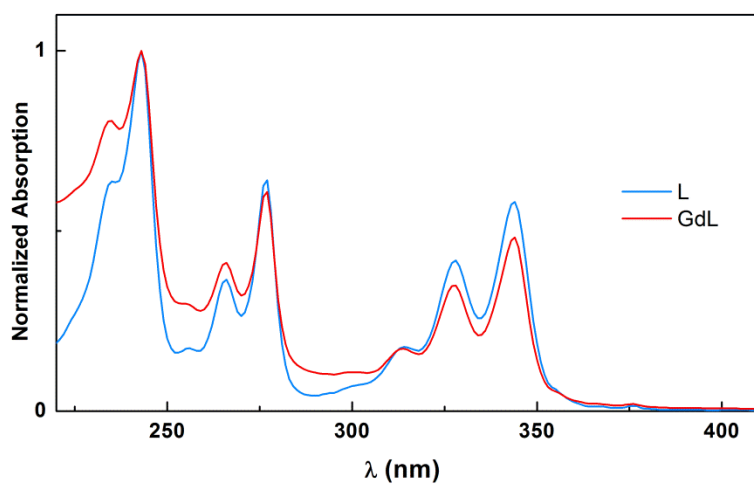

**Figure S5.** UV-Vis spectra for the free ligand **L** and for the Gd**L** complex in water ( $1.0 \times 10^{-5}$  M, pH 7.0, 25 °C).

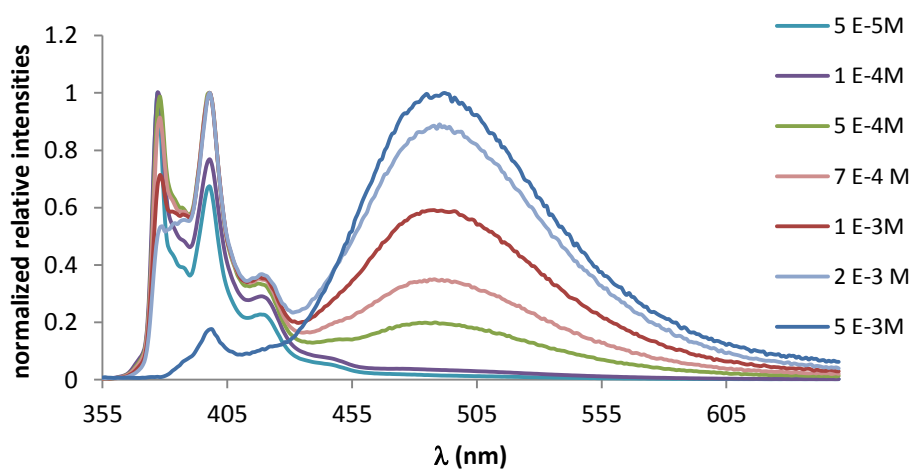

**Figure S6.** Fluorescence spectra for free ligand **L** in non-deoxygenated water (pH 7.0, 25 °C) over the concentration range  $5 \times 10^{-5}$  -  $5 \times 10^{-3}$  mol.dm<sup>-3</sup> ( $\lambda_{\text{exc}}$  = 345 nm).

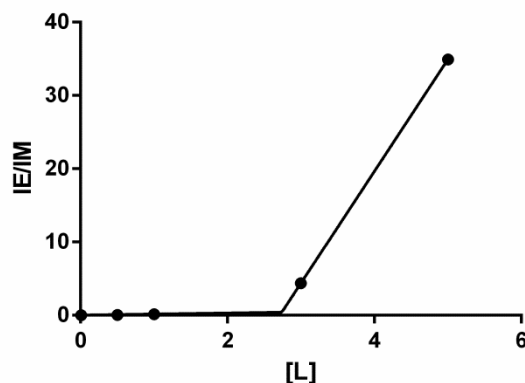

**Figure S7.** Changes in the emission properties of the free ligand **L** as the ratio of the fluorescence emission intensity for the *excimer* (490 nm) and for the monomer (377 nm) ( $I_E/I_M$ ) as function of ligand concentration. Line fitted to **equation S1**.

The experimental data in **Figure 5** (manuscript) and **Figure S6** were fitted (Prima GraphPad) to a sigmoidal model (**equation S1**).[1,2]

$$\left(\frac{I_{Exc}}{I_{Mono}}\right) = \left(\frac{I_{Exc}}{I_{Mono}}\right)_0 + A_1 c + d(A_2 - A_1) \ln\left(\frac{1 + e^{\frac{(c-cmc)}{d}}}{e^{-\frac{cmc}{d}}}\right)$$

**Equation S1**

$c$  - complex (GdL) or free ligand (**L**) concentration;  
 $A_1$  and  $A_2$  - represent the limits of sigmoidal function that describes the behaviour of  $d(I_{Exc}/I_{Mono})/dc$  (derivative of  $I_{Exc}/I_{Mono}$  in order to  $c$ );  
 $d$  - is the time constant of the function and is related to the range of concentration over which the abrupt change in  $I_{Exc}/I_{Mono}$  occurs;  
 $cmc$  - is the center of the sigmoidal function.

**Table S1.** Best fit values for the fitting (Prima GraphPad) of the experimental data of  $I_{Exc}/I_{Mono}$  vs [GdL] (**Figure 5** in manuscript and **Figure S6**) to **equation S1**.

| Best-fit values        | GdL      |
|------------------------|----------|
| $(I_{Exc}/I_{Mono})_0$ | -1,764   |
| $A_1$                  | 0,3660   |
| $d$                    | 0,007795 |
| $A_2$                  | 3,119    |
| $cmc$                  | 0,6454   |
| Std. Error             |          |
| $(I_{Exc}/I_{Mono})_0$ | 0,007529 |
| $A_1$                  | 0,06346  |
| $d$                    | 71873    |
| $A_2$                  | 0,002088 |
| $cmc$                  | 0,01454  |

The E titration data (**Figure 7** in manuscript) were fitted to **equation S2** with *n*, number of equivalent binding sites, fixed to 1.

$$R_1^{pobs} = 10^3 \times \left\{ \left( r_1^f \cdot c_1 \right) + \frac{1}{2} \left( r_1^e - r_1^f \right) \times \left( n \cdot c_{HSA} + c_1 + K_A^{-1} - \sqrt{\left( n \cdot c_{HSA} + c_1 + K_A^{-1} \right)^2 - 4 \cdot n \cdot c_{HSA} \cdot c_1} \right) \right\}$$

**Equation S2**

*n* - number of equivalent binding sites, fixed to 1 in the fitting.  
*r<sub>f</sub>*<sup>f</sup> - relaxivity of the free GdL form, non-complexed with HSA  
*r<sub>f</sub>*<sup>e</sup> - relaxivity of the GdL form bound to HSA  
*c<sub>l</sub>* - analytical concentration of GdL  
*c<sub>HSA</sub>* - analytical concentration of HSA  
*K<sub>A</sub>* - association constant GdL/HSA

**Table S2.** Biodistribution, stated as percentage of injected dose per gram of organ (%ID/g ±SD), of <sup>153</sup>SmL in Wistar rats at 1 and 24 hours after *i.v.* injection. Results are the mean of 4 animals.

| Organ              | 1 hour<br>%ID±SD | 24 hours<br>%ID±SD           |
|--------------------|------------------|------------------------------|
| Blood              | 0.3071±0.0290    | 0.0015±6.5x10 <sup>-5</sup>  |
| Liver              | 0.2095±0.0617    | 0.4701±0.1216                |
| Spleen             | 0.1784±0.0581    | 0.3012±0.1646                |
| Kidney             | 0.0629±0.0105    | 0.0242±0.0026                |
| Heart              | 0.0385±0.0224    | 0.0044±0.0014                |
| Lung               | 0.1084±0.0220    | 0.0274±0.0104                |
| S. Intest.         | 0.0352±0.0190    | 0.0066±0.0011                |
| L. Intest.         | 0.0125±0.0015    | 0.0035±0.0029                |
| Bone               | 0.0365±0.0078    | 0.0411±0.0057                |
| Muscle             | 0.0095±0.0048    | 0.011±0.00010                |
| Brain + Cerebellum | 0.0213±0.0134    | 0.0007±8.15x10 <sup>-5</sup> |

## APPENDIX 1: Analysis of NMRD and $^{17}\text{O}$ NMR data

NMRD and  $^{17}\text{O}$  NMR data have been analysed within the framework of Solomon-Bloembergen-Morgan theory.

### $^{17}\text{O}$ NMR spectroscopy

From the measured  $^{17}\text{O}$  NMR relaxation rates and angular frequencies of the paramagnetic solutions,  $1/T_1$ ,  $1/T_2$  and  $\omega$ , and of the acidified water reference,  $1/T_{1A}$ ,  $1/T_{2A}$  and  $\omega_A$ , one can calculate the reduced relaxation rates and chemical shifts,  $1/T_{2r}$  and  $\Delta\omega_r$ , which may be written as in Equations (A1)-(A3), where,  $1/T_{1m}$ ,  $1/T_{2m}$  is the relaxation rate of the bound water and  $\Delta\omega_m$  is the chemical shift difference between bound and bulk water,  $\tau_m$  is the mean residence time or the inverse of the water exchange rate  $k_{ex}$  and  $P_m$  is the mole fraction of the bound water. [3, 4]

$$\frac{1}{T_{1r}} = \frac{1}{P_m} \left[ \frac{1}{T_1} - \frac{1}{T_{1A}} \right] = \frac{1}{T_{1m} + \tau_m} + \frac{1}{T_{1os}} \quad (\text{A1})$$

$$\frac{1}{T_{2r}} = \frac{1}{P_m} \left[ \frac{1}{T_2} - \frac{1}{T_{2A}} \right] = \frac{1}{\tau_m} \frac{T_{2m}^{-2} + \tau_m^{-1} T_{2m}^{-1} + \Delta\omega_m^2}{(\tau_m^{-1} + T_{2m}^{-1})^2 + \Delta\omega_m^2} + \frac{1}{T_{2os}} \quad (\text{A2})$$

$$\Delta\omega_r = \frac{1}{P_m} (\omega - \omega_A) = \frac{\Delta\omega_m}{(1 + \tau_m T_{2m}^{-1})^2 + \tau_m^2 \Delta\omega_m^2} + \Delta\omega_{os} \quad (\text{A3})$$

The outer sphere contributions to the  $^{17}\text{O}$  relaxation rates  $1/T_{1os}$  and  $1/T_{2os}$  can be neglected according to previous studies.[5] Therefore, Equations (A1-A2) can be further

simplified into Equations (A4) and (A5):

$$\frac{1}{T_{1r}} = \frac{1}{T_{1m} + \tau_m} \quad (\text{A4})$$

$$\frac{1}{T_{2r}} = \frac{1}{T_{2m} + \tau_m} \quad (\text{A5})$$

The exchange rate is supposed to obey the Eyring equation. In equation (A6)  $\Delta S^\ddagger$  and  $\Delta H^\ddagger$  are the entropy and enthalpy of activation for the water exchange process, and  $k_{\text{ex}}^{298}$  is the exchange rate at 298.15 K.

$$\frac{1}{\tau_m} = k_{\text{ex}} = \frac{k_B T}{h} \exp \left\{ \frac{\Delta S^\ddagger}{R} - \frac{\Delta H^\ddagger}{RT} \right\} = \frac{k_{\text{ex}}^{298} T}{298.15} \exp \left\{ \frac{\Delta H^\ddagger}{R} \left( \frac{1}{298.15} - \frac{1}{T} \right) \right\} \quad (\text{A6})$$

In the transverse relaxation, the scalar contribution,  $1/T_{2\text{sc}}$ , is the most important [Equation (A7)].  $1/\tau_{s1}$  is the sum of the exchange rate constant and the electron spin relaxation rate [Equation (A8)].

$$\frac{1}{T_{2m}} \cong \frac{1}{T_{2\text{sc}}} = \frac{S(S+1)}{3} \left( \frac{A}{\hbar} \right)^2 \left( \tau_{s1} + \frac{\tau_{s2}}{1 + \omega_s^2 \tau_{s2}^2} \right) \quad (\text{A7})$$

$$\frac{1}{\tau_{s1}} = \frac{1}{\tau_m} + \frac{1}{T_{1e}} \quad (\text{A8})$$

The  $^{17}\text{O}$  longitudinal relaxation rates in  $\text{Gd}^{3+}$  solutions are the sum of the contributions of the dipole-dipole ( $dd$ ) and quadrupolar ( $q$ ) mechanisms as expressed by Equations

(A11-A13) for non-extreme narrowing conditions, where  $\gamma_S$  is the electron and  $\gamma_I$  is the nuclear gyromagnetic ratio ( $\gamma_S = 1.76 \times 10^{11} \text{ rad s}^{-1} \text{ T}^{-1}$ ,  $\gamma_I = -3.626 \times 10^7 \text{ rad s}^{-1} \text{ T}^{-1}$ ),  $r_{GdO}$  is the effective distance between the electron charge and the  $^{17}\text{O}$  nucleus,  $I$  is the nuclear spin (5/2 for  $^{17}\text{O}$ ),  $\chi$  is the quadrupolar coupling constant and  $\eta$  is an asymmetry parameter :

$$\frac{1}{T_{1m}} = \frac{1}{T_{1dd}} + \frac{1}{T_{1q}} \quad (\text{A9})$$

with:

$$\frac{1}{T_{1dd}} = \frac{2}{15} \left( \frac{\mu_0}{4\pi} \right)^2 \frac{\hbar^2 \gamma_I^2 \gamma_S^2}{r_{GdO}^6} S(S+1) \times [3J(\omega_I; \tau_{d1}) + 7J(\omega_S; \tau_{d2})] \quad (\text{A10})$$

$$\frac{1}{T_{1q}} = \frac{3\pi^2}{10} \frac{2I+3}{I^2(2I-1)} \chi^2 (1 + \eta^2/3) \times [0.2J_1(\omega_I) + 0.8J_2(\omega_I)] \quad (\text{A11})$$

In Equation (A3) the chemical shift of the bound water molecule,  $\Delta\omega_m$ , depends on the hyperfine interaction between the  $\text{Gd}^{3+}$  electron spin and the  $^{17}\text{O}$  nucleus and is directly proportional to the scalar coupling constant,  $\frac{A}{\hbar}$ , as expressed in Equation (A12).[6]

$$\Delta\omega_m = \frac{g_L \mu_B S(S+1) B}{3k_B T} \frac{A}{\hbar} \quad (\text{A12})$$

The isotopic Landé  $g$  factor is equal to 2.0 for the  $\text{Gd}^{3+}$ ,  $B$  represents the magnetic field, and  $k_B$  is the Boltzmann constant.

The outer-sphere contribution to the chemical shift is assumed to be linearly related to  $\Delta\omega_m$  by a constant  $C_{os}$  [Equation (A13)]. [7]

$$\Delta\omega_{os} = C_{os} \Delta\omega_m \quad (\text{A13})$$

## **NMRD**

The measured longitudinal proton relaxation rate,  $R_1^{obs} = 1/T_1^{obs}$ , is the sum of a paramagnetic and a diamagnetic contribution as expressed in Equation (A14), where  $r_I$  is the proton relaxivity:

$$R_1^{obs} = R_1^d + R_1^p = R_1^d + r_I [\text{Gd}^{3+}] \quad (\text{A14})$$

The relaxivity can be divided into an inner and an outer sphere term as follows:

$$r_I = r_{Iis} + r_{Ios} \quad (\text{A15})$$

The inner sphere term is given in Equation (A16), where  $q$  is the number of inner sphere

water molecules. [8]

$$r_{is} = \frac{1}{1000} \times \frac{q}{55.55} \times \frac{1}{T_{lm}^H + \tau_m} \quad (\text{A16})$$

The longitudinal relaxation rate of inner sphere protons,  $1/T_{lm}^H$  is expressed by Equation (A11), where  $r_{GdH}$  is the effective distance between the electron charge and the  $^1\text{H}$  nucleus,  $\omega_l$  is the proton resonance frequency and  $\omega_s$  is the Larmor frequency of the  $\text{Gd}^{3+}$  electron spin.

$$\frac{1}{T_{lm}^H} = \frac{2}{15} \left( \frac{\mu_0}{4\pi} \right)^2 \frac{\hbar^2 \gamma_I^2 \gamma_S^2}{r_{GdH}^6} S(S+1) \times [3J(\omega_l; \tau_{d1}) + 7J(\omega_s; \tau_{d2})] \quad (\text{A17})$$

$$\frac{1}{\tau_{di}} = \frac{1}{\tau_m} + \frac{1}{\tau_{RH}} + \frac{1}{T_{ie}} \quad \text{for } i = 1, 2 \quad (\text{A18})$$

where  $\tau_{RH}$  is the rotational correlation time of the  $\text{Gd-H}_{\text{water}}$  vector.

For small molecular weight chelates (fast rotation), the spectral density function is expressed as in Equation (A19).

$$J(\omega; \tau) = \left( \frac{\tau}{1 + \omega^2 \tau^2} \right) \quad (\text{A19})$$

For slowly rotating species, the spectral density functions are described the Lipari-Szabo approach.[9] In this model we distinguish two statistically independent motions;

a rapid local motion with a correlation time  $\tau_l$  and a slower global motion with a correlation time  $\tau_g$ . Supposing the global molecular reorientation is isotropic, the relevant spectral density functions are expressed as in Equations (A20-A24), where the general order parameter  $S^2$  describes the degree of spatial restriction of the local motion. If the local motion is isotropic,  $S^2 = 0$ ; if the rotational dynamics is only governed by the global motion,  $S^2 = 1$ .

$$J(\omega_I; \tau_{d1}) = \left( \frac{S^2 \tau_{d1g}}{1 + \omega_I^2 \tau_{d1g}^2} + \frac{(1 - S^2) \tau_{d1}}{1 + \omega_I^2 \tau_{d1}^2} \right) \quad (\text{A20})$$

$$J(\omega_S; \tau_{d2}) = \left( \frac{S^2 \tau_{d2g}}{1 + \omega_S^2 \tau_{d2g}^2} + \frac{(1 - S^2) \tau_{d2}}{1 + \omega_S^2 \tau_{d2}^2} \right) \quad (\text{A21})$$

$$\frac{1}{\tau_{dig}} = \frac{1}{\tau_m} + \frac{1}{\tau_g} + \frac{1}{T_{ie}} \quad i = 1, 2 \quad (\text{A22})$$

$$\frac{1}{\tau} = \frac{1}{\tau_g} + \frac{1}{\tau_l} \quad (\text{A23})$$

$$J_i(\omega_I) = \left( \frac{S^2 \tau_g}{1 + i^2 \omega_I^2 \tau_g^2} + \frac{(1 - S^2) \tau}{1 + i^2 \omega_I^2 \tau^2} \right) \quad i = 1, 2 \quad (\text{A24})$$

The rotational correlation time,  $\tau_{RH}$  is assumed to have simple exponential temperature dependence with an  $E_R$  activation energy as given in Equation (A25).

$$\tau_{RO} = \tau_{RO}^{298} \exp \left[ \frac{E_R}{R} \left( \frac{1}{T} - \frac{1}{298.15} \right) \right] \quad (\text{A25})$$

The outer-sphere contribution can be described by Equations (A26 and A27) where  $N_A$  is the Avogadro constant, and  $J_{os}$  is its associated spectral density function as given by Equation (A15). [10, 11]

$$r_{los} = \frac{32 N_A \pi \left( \frac{\mu_0}{4 \pi} \right)^2 \frac{\hbar^2 \gamma_S^2 \gamma_I^2}{a_{GdH} D_{GdH}} S(S+1) [3 J_{os}(\omega_I, T_{1e}) + 7 J_{os}(\omega_S, T_{2e})] \quad (\text{A26})$$

$$J_{os}(\omega, T_{je}) = \text{Re} \left[ \frac{1 + 14 \left( i\omega \tau_{GdH} + \frac{\tau_{GdH}}{T_{je}} \right)^{1/2}}{1 + \left( i\omega \tau_{GdH} + \frac{\tau_{GdH}}{T_{je}} \right)^{1/2} + 49 \left( i\omega \tau_{GdH} + \frac{\tau_{GdH}}{T_{je}} \right) + 19 \left( i\omega \tau_{GdH} + \frac{\tau_{GdH}}{T_{je}} \right)^{3/2}} \right] \quad (\text{A27})$$

$j=1,2$

The longitudinal and transverse electronic relaxation rates,  $1/T_{1e}$  and  $1/T_{2e}$  are expressed by Equation (A28 and A29), where  $\tau_v$  is the electronic correlation time for the modulation of the zero-field-splitting interaction,  $E_v$  the corresponding activation energy and  $\Delta^2$  is the mean square zero-field-splitting energy. We assumed a simple exponential dependence of  $\tau_v$  versus  $1/T$  as written in Equation (A30).

$$\left(\frac{I}{T_{le}}\right)^{ZFS} = \frac{I}{25} \Delta^2 \tau_v \{4S(S+1) - 3\} \left( \frac{I}{1 + \omega_s^2 \tau_v^2} + \frac{4}{1 + 4\omega_s^2 \tau_v^2} \right) \quad (\text{A28})$$

$$\left(\frac{I}{T_{2e}}\right)^{ZFS} = \Delta^2 \tau_v \left( \frac{5.26}{1 + 0.372\omega_s^2 \tau_v^2} + \frac{7.18}{1 + 1.24\omega_s^2 \tau_v^2} \right) \quad (\text{A29})$$

$$\tau_v = \tau_v^{298} \exp \left[ \frac{E_v}{R} \left( \frac{1}{T} - \frac{1}{298.15} \right) \right] \quad (\text{A30})$$

The diffusion coefficient for the diffusion of a water proton away from a  $\text{Gd}^{3+}$  complex,  $D_{\text{GdH}}$ , is assumed to obey an exponential law versus the inverse of the temperature, with activation energy  $E_{\text{DGdH}}$ , as given in Equation (A31).  $D_{\text{GdH}}^{298}$  is the diffusion coefficient at 298.15K.

$$D_{\text{GdH}} = D_{\text{GdH}}^{298} \exp \left\{ \frac{E_{\text{GdH}}}{R} \left( \frac{1}{298.15} - \frac{1}{T} \right) \right\} \quad (\text{A31})$$

## References:

1. C. Wang, S. D. Wettig, M. Foldvari, R. E. Verrall, *Langmuir*, 2007, **23**, 8995.
2. P. Carpena, J. Aguiar, P. Bernaola-Galván, C. Carnero Ruiz, *Langmuir*, 2002, **18**, 6054.
3. Swift TJ, Connick RE, *J Chem Phys*, 1962, **37**, 307.
4. Zimmerman JR, Brittin WE, *J Phys Chem*, 1957, **61**, 1328.
5. Micskei K, Helm L, Brucher E, Merbach AE, *Inorg Chem*, 1993, **32**, 3844.
6. Brittain HG, Desreux JF, *Inorg Chem*, 1984, **23**, 4459.
7. Gonzalez G, Powell DH, Tissieres V, Merbach AE, *J Phys Chem*, 1994, **98**, 53.
8. Luz Z, Meiboom S, *J Chem Phys*, 1964, **40**, 2686.
9. Dunand FA, Tóth E, Hollister R, Merbach AE, *J Biol Inorg Chem*, 2001, **6**, 247.
10. Freed JH, *J Chem Phys*, 1978, **68**, 4034.
11. Koenig SH, Brown RD, Spiller M, et al, *Biophys J*, 1992, **61**, 776.
